# Supplementary material for: Seasonal Energetic Stress in a Tropical Forest Primate: Proximate Causes and Evolutionary Implications
Source: PubMed Central journal article supplement (PMC3509155; doi:10.1371/journal.pone.0050108), 2012-11-28
Supplement: pone.0050108.s003.pdf [file pone.0050108.s003.pdf]

**Supporting Information: “Seasonal energetic stress in a tropical forest primate: proximate causes and evolutionary implications”**

Steffen Foerster, Marina Cords, Steven L. Monfort

**Table S1: List of General Linear Mixed Models testing hypotheses about the causes of monthly fGCs variation.**

Models include reproductive state, feeding behavior, social interactions, and fiber content, for six non-consecutive months. Shown are multivariate models with non-zero fixed effects as well as univariate models for all predictors (controlling for reproductive state). Evidence ratios give the odds against a given model being the best model, given the data and the best model in the set.

| Model AIC <sub>C</sub> | Intercept | Reproductive state | Time feeding on fruits | Time feeding on mature leaves | Time feeding on young leaves | Time feeding on flowers | Time feeding on insects | Time feeding on other | Time feeding | Rate of agonism | Time grooming | Time moving | Distance moved per follow | Fiber content | Evidence Ratio  |
|------------------------|-----------|--------------------|------------------------|-------------------------------|------------------------------|-------------------------|-------------------------|-----------------------|--------------|-----------------|---------------|-------------|---------------------------|---------------|-----------------|
| 805.1                  | x         | x                  |                        | x                             |                              |                         | x                       | x                     | x            |                 |               |             |                           | x             | 1               |
| 812.4                  | x         | x                  |                        |                               |                              |                         | x                       | x                     | x            |                 |               |             |                           | x             | 38              |
| 816.4                  | x         | x                  |                        |                               |                              |                         | x                       | x                     |              |                 |               |             |                           | x             | 293             |
| 817.6                  | x         | x                  |                        | x                             |                              |                         | x                       | x                     |              |                 |               |             |                           |               | 528             |
| 818.5                  | x         | x                  |                        | x                             |                              |                         | x                       | x                     | x            |                 |               |             |                           |               | 816             |
| 850.1                  | x         | x                  |                        |                               |                              |                         |                         | x                     |              |                 |               |             |                           |               | 5999848165      |
| 850.1                  | x         | x                  |                        | x                             |                              |                         |                         |                       |              |                 |               |             |                           |               | 6121053138      |
| 853.6                  | x         | x                  |                        |                               |                              |                         | x                       |                       |              |                 |               |             |                           |               | 34183195479     |
| 853.9                  | x         | x                  |                        |                               |                              |                         |                         |                       |              | x               |               |             |                           |               | 40924715155     |
| 854.8                  | x         | x                  |                        |                               |                              |                         |                         |                       |              |                 |               | x           |                           |               | 62285843140     |
| 856.6                  | x         | x                  |                        |                               |                              |                         |                         |                       |              | x               | x             |             |                           |               | 156293267620    |
| 857.1                  | x         | x                  |                        |                               |                              |                         |                         |                       |              |                 |               |             |                           |               | 201690463465    |
| 858.3                  | x         | x                  |                        |                               |                              | x                       |                         |                       |              |                 |               |             |                           |               | 369346106731    |
| 858.5                  | x         | x                  |                        |                               | x                            |                         |                         |                       |              |                 |               |             |                           |               | 394151030919    |
| 859.5                  | x         | x                  |                        |                               |                              |                         |                         |                       |              |                 |               |             | x                         |               | 662972932164    |
| 859.8                  | x         | x                  | x                      |                               |                              |                         |                         |                       |              |                 |               |             |                           |               | 785825032788    |
| 859.9                  | x         | x                  |                        |                               |                              |                         |                         |                       |              |                 | x             |             |                           |               | 801699751477    |
| 870.5                  | x         |                    |                        |                               |                              |                         |                         |                       |              |                 |               |             |                           |               | 163854507399628 |
