# Supplementary material for: Seasonal Energetic Stress in a Tropical Forest Primate: Proximate Causes and Evolutionary Implications
Source: PubMed Central journal article supplement (PMC3509155; doi:10.1371/journal.pone.0050108), 2012-11-28
Supplement: pone.0050108.s004.pdf [file pone.0050108.s004.pdf]

**Supporting Information: “Seasonal energetic stress in a tropical forest primate: proximate causes and evolutionary implications”**

Steffen Foerster, Marina Cords, Steven L. Monfort

**Table S2: List of General Linear Mixed Models testing hypotheses about the causes of monthly fGCs variation.**

Models include reproductive state, estimates of food availability (FA), rainfall, and fiber content, for six non-consecutive months. Shown are multivariate models with non-zero fixed effects as well as univariate models for all predictors. Evidence ratios give the odds against a given model being the best model, given the data and the best model in the set.

| <b>Model<br/>AIC<sub>c</sub></b> | <b>Intercept</b> | <b>Reproductive state</b> | <b>FA Fruits (main items)</b> | <b>FA Fruits</b> | <b>FA Young leaves (main items)</b> | <b>FA Young leaves</b> | <b>FA Flowers</b> | <b>FA Other items</b> | <b>Rainfall</b> | <b>Fiber content</b> | <b>Evidence Ratio</b> |
|----------------------------------|------------------|---------------------------|-------------------------------|------------------|-------------------------------------|------------------------|-------------------|-----------------------|-----------------|----------------------|-----------------------|
| 806.3                            | x                | x                         |                               |                  | x                                   |                        | x                 | x                     | x               |                      | 1                     |
| 808.0                            | x                | x                         |                               |                  | x                                   |                        | x                 | x                     |                 | x                    | 2                     |
| 813.0                            | x                | x                         |                               |                  |                                     |                        |                   |                       |                 |                      | 29                    |
| 816.0                            | x                | x                         |                               | x                | x                                   |                        | x                 | x                     |                 |                      | 128                   |
| 819.8                            | x                | x                         |                               | x                |                                     | x                      | x                 |                       | x               |                      | 851                   |
| 859.0                            | x                |                           |                               |                  |                                     |                        |                   |                       | x               |                      | 277753537039          |
| 859.6                            | x                |                           |                               |                  | x                                   |                        |                   |                       |                 |                      | 374928058308          |
| 868.0                            | x                |                           |                               |                  |                                     | x                      |                   |                       |                 |                      | 25002576612851        |
| 869.3                            | x                |                           |                               | x                |                                     |                        |                   |                       |                 |                      | 47893456332463        |
| 870.5                            | x                |                           |                               |                  |                                     |                        |                   |                       |                 |                      | 87267567199066        |
| 871.9                            | x                |                           | x                             |                  |                                     |                        |                   |                       |                 |                      | 175735299721479       |
| 873.9                            | x                |                           |                               |                  |                                     |                        | x                 |                       |                 |                      | 477698071851700       |
| 875.1                            | x                |                           |                               |                  |                                     |                        |                   | x                     |                 |                      | 870422637631299       |
