# Supplementary material for: Seasonal Energetic Stress in a Tropical Forest Primate: Proximate Causes and Evolutionary Implications
Source: PubMed Central journal article supplement (PMC3509155; doi:10.1371/journal.pone.0050108), 2012-11-28
Supplement: pone.0050108.s005.pdf [file pone.0050108.s005.pdf]

**Supporting Information: “Seasonal energetic stress in a tropical forest primate: proximate causes and evolutionary implications”**

Steffen Foerster, Marina Cords, Steven L. Monfort

**Table S3: List of General Linear Mixed Models testing hypotheses about the causes of monthly fGCs variation.**

Models include the best behavioral and environmental predictors identified in Tables S1 and S2. Evidence ratios give the odds against a given model being the best model, given the data and the best model in the set.

| <b>Model<br/>AIC<sub>C</sub></b> | <b>Intercept</b> | <b>Reproductive state</b> | <b>FA Fruits (main items)</b> | <b>FA Young leaves (main items)</b> | <b>FA Flowers</b> | <b>FA Other items</b> | <b>Rainfall</b> | <b>Time feeding on fruits</b> | <b>Time feeding on mature leaves</b> | <b>Time feeding on young leaves</b> | <b>Time feeding on flowers</b> | <b>Time feeding on insects</b> | <b>Time feeding</b> | <b>Evidence Ratio</b> |
|----------------------------------|------------------|---------------------------|-------------------------------|-------------------------------------|-------------------|-----------------------|-----------------|-------------------------------|--------------------------------------|-------------------------------------|--------------------------------|--------------------------------|---------------------|-----------------------|
| 792.8                            | x                | x                         |                               | x                                   | x                 | x                     | x               |                               |                                      |                                     |                                | x                              | x                   | 1                     |
| 792.8                            | x                | x                         |                               | x                                   | x                 | x                     | x               | x                             |                                      | x                                   |                                | x                              | x                   | 1                     |
| 794.7                            | x                | x                         |                               | x                                   | x                 | x                     | x               | x                             |                                      |                                     |                                | x                              | x                   | 3                     |
| 794.7                            | x                | x                         |                               | x                                   | x                 | x                     | x               |                               |                                      | x                                   |                                | x                              | x                   | 3                     |
| 798.9                            | x                | x                         | x                             | x                                   | x                 | x                     | x               |                               |                                      |                                     |                                | x                              | x                   | 21                    |
| 801.3                            | x                | x                         |                               | x                                   | x                 | x                     | x               |                               | x                                    |                                     |                                | x                              |                     | 70                    |
| 803.4                            | x                | x                         |                               | x                                   | x                 | x                     | x               |                               | x                                    | x                                   |                                | x                              |                     | 199                   |
| 805.1                            | x                | x                         |                               | x                                   | x                 | x                     | x               | x                             | x                                    | x                                   |                                | x                              |                     | 466                   |
| 805.1                            | x                | x                         |                               | x                                   | x                 | x                     | x               | x                             | x                                    | x                                   | x                              | x                              |                     | 466                   |
| 806.3                            | x                | x                         |                               | x                                   | x                 | x                     | x               |                               |                                      |                                     |                                |                                |                     | 850                   |
